# Supplementary material for: Impact of Small Groups with Heterogeneous Preference on Behavioral Evolution in Population Evacuation
Source: PLoS One. 2015 Mar 20;10(3):e0121949. doi: 10.1371/journal.pone.0121949 (PMC4367991; doi:10.1371/journal.pone.0121949)
Supplement: S2 Dataset — (XLSX) [file pone.0121949.s002.xlsx]

## Sheet: MCS=1
1	2	2	3	3	3	2	3	3	2	3	3	1	2	0	2	2	2	2	2	2	0	3	2	3	3	0	2	2	3	3	2	3	2	2	2	2	3	3	3	3	3	3	3	2	3	2	3	2	3
3	3	3	2	2	2	3	2	3	2	0	3	3	3	2	3	2	3	3	3	3	3	2	2	3	3	2	2	2	2	2	2	3	2	3	2	2	3	2	2	3	2	3	3	3	3	3	3	2	3
1	3	2	2	2	3	2	1	3	2	3	2	3	2	3	2	3	0	1	2	3	2	3	3	2	0	3	2	2	2	3	3	2	3	3	2	0	2	3	0	2	2	2	3	0	0	2	2	3	2
3	1	3	3	2	2	2	2	2	2	2	3	2	2	0	2	1	3	3	3	2	2	3	2	2	3	1	3	2	3	2	2	3	2	3	3	3	3	3	2	2	3	3	3	3	3	3	2	2	3
2	3	3	2	3	3	2	2	3	2	3	2	3	3	2	3	2	2	2	3	3	2	3	3	2	3	3	2	2	2	3	3	2	2	2	3	3	2	3	3	2	1	3	3	3	3	2	2	3	2
3	2	3	3	3	3	0	3	3	3	3	3	2	3	2	3	2	3	2	3	3	3	1	3	2	2	3	3	0	3	3	3	3	2	3	3	2	2	3	3	2	1	2	3	3	0	3	2	2	3
2	3	2	2	3	3	2	2	3	3	2	3	3	3	3	1	3	2	3	0	3	2	2	2	2	3	3	3	3	2	2	3	2	2	3	3	2	2	1	2	3	3	3	3	2	2	3	2	1	0
3	2	3	3	1	2	3	3	3	2	2	2	3	2	2	2	3	2	2	3	0	3	2	3	3	2	3	2	2	3	2	3	3	3	3	3	3	3	3	2	2	3	2	3	1	2	2	0	2	2
2	3	2	2	2	3	3	3	0	3	1	0	3	0	2	2	2	3	3	2	1	3	3	2	3	2	3	3	2	2	2	2	3	2	3	2	2	2	2	2	3	2	3	0	3	2	3	3	2	3
3	3	3	0	3	3	3	3	3	3	3	3	3	2	2	2	1	3	2	3	2	2	2	2	3	2	2	3	2	3	2	2	3	3	3	3	2	3	3	3	2	3	2	3	3	2	2	3	3	0
3	3	3	2	2	2	3	3	2	2	0	3	3	3	2	2	3	2	0	3	2	2	2	2	3	2	2	2	3	2	2	2	2	3	2	3	3	2	1	3	3	3	2	2	2	2	3	2	3	3
3	3	3	3	2	2	3	2	2	2	3	2	0	2	3	2	3	2	2	3	1	3	2	3	2	1	2	2	3	2	3	3	3	3	2	0	3	2	3	3	3	2	2	2	2	2	3	3	2	1
3	3	2	3	3	3	2	2	3	2	2	3	3	3	2	2	3	2	3	3	0	2	3	1	3	2	3	2	3	3	3	3	2	2	2	2	3	2	0	2	0	2	2	3	2	3	3	2	3	2
2	2	3	3	3	2	3	1	2	2	3	1	3	3	2	2	2	3	3	3	3	2	2	0	3	3	3	2	0	3	3	2	3	2	2	2	2	2	3	2	3	1	2	2	3	2	1	2	2	2
3	3	2	2	2	3	1	3	3	3	3	2	2	2	2	1	3	2	2	2	3	3	3	3	2	3	3	3	3	2	3	3	2	2	3	2	3	2	2	3	2	2	2	3	1	3	3	3	3	2
3	1	3	3	3	2	3	3	0	3	3	2	3	2	2	2	2	2	3	2	3	0	3	3	2	2	2	2	3	3	3	2	2	2	1	3	2	2	2	2	2	2	2	3	3	3	2	2	2	2
2	0	3	3	1	2	2	3	2	2	2	2	2	3	2	3	3	2	3	2	3	2	2	2	2	3	1	2	2	3	2	3	3	3	3	3	3	0	3	2	3	0	2	0	2	3	2	3	2	3
3	3	2	2	2	3	2	3	2	3	0	2	3	2	3	3	3	1	2	3	2	1	3	2	3	2	2	3	2	2	2	2	2	2	3	2	2	2	0	2	3	2	3	2	2	2	3	2	3	3
3	2	2	3	2	3	3	2	2	3	3	3	3	2	2	2	2	2	2	1	3	3	2	2	3	3	3	3	3	0	2	2	3	2	2	2	3	2	2	3	2	2	3	2	2	2	3	2	3	2
2	3	3	2	3	3	3	2	3	3	3	3	1	0	3	2	3	3	3	3	3	3	3	2	1	2	2	2	1	3	3	3	3	2	3	2	2	2	2	3	3	2	2	2	3	2	1	0	3	3
2	3	2	2	2	0	3	3	0	3	3	3	3	3	3	1	3	3	2	1	2	2	3	3	0	2	2	2	3	2	2	3	3	2	3	3	3	0	2	2	2	2	2	3	3	1	1	3	3	2
3	2	0	2	2	0	3	2	3	2	2	3	1	2	2	1	2	2	3	2	3	3	2	2	2	2	3	2	3	3	2	3	1	2	3	2	3	2	3	3	2	2	0	2	2	3	2	2	3	3
3	2	1	3	2	3	3	2	1	3	3	2	1	3	3	2	2	2	3	3	2	2	2	2	0	0	3	2	2	3	2	3	2	3	2	3	2	2	2	2	2	2	1	2	2	2	2	1	3	3
3	3	2	2	3	1	2	3	3	3	2	3	2	3	3	3	3	2	3	2	3	3	2	1	3	2	2	1	3	3	2	1	3	2	3	3	3	3	2	3	3	2	1	2	0	1	2	1	3	3
2	2	2	0	3	2	2	3	3	2	2	3	0	2	3	2	3	3	3	2	1	2	0	3	3	2	2	3	3	2	3	2	2	2	2	2	0	3	2	2	3	2	3	2	2	3	2	2	3	3
2	3	3	2	2	3	3	2	2	2	3	2	3	3	2	3	3	3	2	2	2	3	3	1	3	3	1	3	3	2	2	2	2	3	2	3	2	2	3	2	2	3	3	3	2	3	3	2	2	3
3	2	2	2	3	2	3	3	2	3	3	0	0	2	2	3	2	3	3	3	2	2	1	3	3	2	1	3	3	2	2	2	2	2	3	2	2	3	2	3	1	0	2	1	2	2	3	2	3	3
0	3	2	2	3	0	2	2	2	2	0	3	3	3	3	3	3	3	2	3	3	2	3	3	2	0	2	2	2	2	2	2	3	3	3	3	3	3	2	2	2	1	3	3	3	3	0	2	2	3
3	3	2	1	2	3	3	3	2	3	2	3	2	3	3	2	3	3	3	3	3	1	2	3	2	3	0	2	2	3	3	2	2	3	2	2	2	2	2	2	3	2	0	3	2	2	2	3	1	2
2	2	3	2	3	3	2	3	2	1	2	2	2	3	3	0	2	2	2	3	3	3	3	2	3	2	2	2	3	2	2	1	3	3	2	2	2	3	3	3	1	3	3	2	3	2	2	3	2	2
3	3	3	3	3	2	2	2	3	3	3	3	3	2	2	3	3	3	2	1	2	2	3	2	2	2	1	2	2	2	2	3	2	2	2	0	3	3	3	2	3	3	3	3	3	2	3	3	3	3
2	3	2	3	2	2	2	3	3	3	2	3	3	3	2	3	2	2	3	1	1	2	2	3	3	2	2	2	3	2	3	3	3	2	1	2	3	2	2	3	2	2	3	3	3	2	3	3	2	3
2	2	3	2	2	2	2	3	2	3	3	2	2	2	3	3	3	3	2	0	3	2	0	3	2	2	3	2	2	3	3	3	3	1	3	1	2	2	3	2	3	3	0	3	1	2	3	3	1	2
2	2	2	2	2	3	3	2	3	3	3	2	2	2	3	3	2	0	2	2	0	3	2	2	3	3	2	2	3	1	2	3	2	3	2	2	3	3	2	3	3	3	2	2	3	3	2	3	2	3
3	3	3	3	2	2	2	2	2	2	3	3	0	0	2	2	2	3	2	2	3	3	3	3	3	2	1	3	3	3	2	3	2	3	3	2	3	2	3	2	2	2	3	2	2	2	2	0	2	1
3	3	1	3	2	2	3	2	3	0	3	2	2	2	2	2	2	2	2	2	2	2	2	2	3	1	2	3	2	3	2	3	3	3	3	3	3	2	2	2	3	3	3	2	3	3	3	1	3	3
3	3	3	0	0	2	3	3	2	3	2	2	3	2	2	2	2	2	3	3	1	3	3	2	2	3	2	2	2	3	3	2	3	2	2	3	2	2	3	2	3	3	0	2	2	0	3	3	1	2
2	2	3	1	2	2	3	2	2	2	2	1	3	2	3	2	1	3	2	3	2	2	2	2	2	0	3	3	2	3	3	2	3	2	2	2	2	0	3	2	2	2	3	3	3	3	0	3	3	2
3	3	0	2	3	3	2	2	2	2	2	2	3	2	2	2	2	1	2	3	2	3	2	2	3	2	3	2	3	3	3	3	3	2	3	2	2	3	2	3	2	1	0	3	2	2	3	2	1	3
3	3	0	3	2	3	2	3	3	0	2	3	2	2	3	3	3	3	2	3	3	3	2	3	3	1	2	2	2	2	2	3	3	0	0	3	2	2	2	2	3	2	2	2	3	2	2	3	2	3
2	2	3	3	2	3	3	2	2	0	2	3	3	3	3	3	2	3	2	2	2	3	3	1	3	1	3	2	2	3	3	3	3	2	3	2	2	2	2	2	2	0	2	2	3	3	2	2	2	3
1	2	2	3	3	3	3	2	3	3	3	1	3	2	2	3	2	2	3	2	3	2	2	2	1	2	3	2	0	3	1	3	3	2	3	3	2	2	2	3	0	3	2	3	0	2	2	0	3	3
2	0	3	3	0	2	3	2	3	1	1	3	2	3	3	3	2	3	3	3	2	0	2	2	2	3	1	3	3	2	2	3	3	2	3	3	1	2	3	3	3	3	2	2	3	3	2	3	2	0
2	1	0	2	3	2	2	3	3	2	2	3	3	2	3	3	2	3	3	2	3	2	3	2	3	3	1	1	2	1	3	2	3	2	3	3	3	2	3	2	3	3	2	2	3	2	2	2	0	3
2	2	3	2	3	3	3	2	2	2	3	3	1	3	0	0	3	2	3	0	3	2	3	3	2	1	2	3	3	2	3	3	3	2	3	3	3	3	3	2	3	3	2	3	3	3	2	2	3	3
2	2	1	1	2	2	3	2	2	2	2	3	0	3	2	3	2	3	2	2	2	2	2	3	2	3	3	2	2	2	1	3	3	2	2	2	2	3	3	2	2	2	3	0	3	3	3	3	2	2
2	2	3	1	2	3	3	2	0	3	3	2	2	3	2	3	3	2	3	1	2	2	2	0	3	3	3	3	2	3	2	3	3	3	3	2	2	1	3	2	1	2	2	2	3	2	2	2	3	1
2	2	3	3	2	2	2	2	3	3	2	3	3	3	2	3	2	3	2	2	3	2	3	1	3	3	2	3	2	2	3	2	2	3	3	2	2	2	3	2	3	2	0	2	2	3	2	0	3	3
2	0	2	2	3	2	3	2	3	2	2	2	3	1	2	2	2	3	3	3	3	3	3	0	2	3	2	2	3	3	2	2	2	2	3	0	2	2	3	2	2	3	3	3	3	2	3	2	3	2
3	2	2	2	3	3	3	2	0	0	2	3	3	3	2	2	3	2	3	1	2	2	3	3	3	2	3	2	3	2	3	1	2	2	3	2	2	0	2	2	2	1	3	3	3	2	3	2	2	3
3	2	2	2	3	3	3	2	2	3	3	0	3	2	3	3	3	3	3	0	3	3	2	2	3	2	3	3	2	3	2	3	3	3	2	3	3	3	3	2	2	3	3	2	3	2	3	3	3	0
2	2	2	2	1	0	3	2	3	3	3	2	3	0	2	3	2	3	3	2	3	1	3	2	2	3	3	2	2	2	3	2	2	2	3	2	3	2	3	2	2	3	3	3	2	3	3	3	3	3
2	3	2	3	2	3	2	2	3	2	3	2	2	0	2	2	3	2	3	3	2	3	2	2	3	2	3	3	2	3	3	2	3	2	3	2	3	3	3	3	3	2	3	3	3	3	3	2	2	3
3	2	2	3	1	2	3	3	3	3	3	2	3	2	2	3	2	2	2	3	3	3	2	3	0	2	3	3	3	3	3	2	2	2	3	3	3	3	2	0	3	0	3	3	3	3	3	2	3	3
3	3	1	3	2	3	2	2	2	2	3	3	2	3	3	2	3	3	3	2	3	3	2	3	3	3	0	1	3	2	2	2	3	2	3	3	2	1	2	3	3	2	3	2	2	3	2	2	2	2
0	3	1	2	3	2	2	3	0	2	2	2	2	2	3	3	3	2	2	3	3	2	3	2	2	2	2	2	3	3	3	2	3	3	2	2	3	3	2	2	3	2	3	2	2	2	2	2	2	3
2	2	3	3	2	3	3	2	3	3	2	3	3	2	3	3	3	3	3	3	3	2	3	2	2	2	2	3	2	2	2	2	3	3	3	3	3	2	2	2	2	1	3	0	3	3	2	0	2	3
2	2	2	3	2	3	3	2	2	1	3	3	3	3	2	3	0	2	3	0	1	3	3	2	3	3	3	0	3	2	3	2	3	0	3	3	2	3	3	0	2	3	3	2	3	2	3	2	1	3
2	2	3	3	2	2	2	2	3	2	3	2	3	1	2	0	3	2	3	3	3	3	3	3	2	2	2	2	3	3	2	1	3	3	2	3	1	3	2	3	2	2	3	3	3	3	3	0	3	2
2	3	3	0	3	3	2	2	2	3	2	2	2	3	3	3	3	3	3	2	0	3	3	3	3	2	2	2	2	3	2	2	0	3	2	2	2	0	3	3	3	3	3	3	2	1	0	3	2	2
3	2	2	3	3	3	2	0	1	2	2	2	3	2	1	3	3	2	1	3	3	3	2	2	0	3	2	3	1	2	2	2	3	3	2	3	3	2	3	3	3	2	3	2	3	1	2	2	3	1
3	2	2	2	3	3	3	2	2	3	2	3	3	3	3	3	2	2	2	3	2	2	3	2	2	1	2	2	2	3	2	3	3	3	2	3	3	0	3	2	3	3	2	2	3	2	2	3	3	3
2	2	3	3	2	3	2	3	2	0	2	0	2	2	2	2	2	2	2	2	3	3	3	2	2	2	2	3	2	2	2	1	3	0	2	3	3	2	3	3	2	3	3	2	2	3	1	3	3	2
2	3	2	3	2	3	2	3	3	2	3	0	0	2	3	3	3	3	3	3	3	2	3	3	3	3	1	2	3	3	0	2	3	3	3	2	1	2	2	3	3	2	0	1	2	3	3	3	3	2
3	2	3	3	2	2	2	2	1	2	2	3	0	2	2	3	3	3	3	3	2	2	2	2	0	3	3	3	2	3	3	2	3	2	1	2	1	3	3	0	2	0	2	3	3	3	3	2	2	2
2	2	1	2	2	3	3	2	3	2	1	2	3	2	3	3	3	2	2	2	1	0	3	2	3	3	2	2	3	1	2	3	3	2	3	2	2	1	3	2	3	2	3	2	2	3	0	3	2	2
2	3	2	3	2	3	3	2	3	2	3	2	2	2	2	2	3	3	2	2	2	3	2	3	3	3	2	2	2	3	3	3	0	2	3	2	2	2	0	2	3	3	3	2	3	3	3	2	3	3
2	3	3	3	2	3	3	2	2	2	3	2	3	2	2	2	3	2	1	3	2	1	1	2	3	3	2	3	2	3	3	0	3	3	3	2	3	3	2	2	3	3	3	2	3	3	1	2	3	3
1	3	2	2	2	2	3	2	3	3	3	2	3	3	2	2	2	3	3	2	2	2	1	0	3	0	0	0	3	2	2	3	0	2	2	3	3	3	3	3	3	1	2	1	3	3	3	2	3	0
2	2	2	2	2	3	3	3	3	3	3	2	3	2	3	3	1	3	2	3	0	3	2	3	2	3	2	2	2	3	2	2	3	3	2	2	2	3	2	2	3	2	2	0	3	3	2	2	2	3
3	3	2	3	2	2	2	3	2	3	2	3	3	2	2	2	2	2	3	2	3	3	3	3	3	0	3	3	1	2	3	2	0	2	2	2	3	3	3	3	2	2	3	3	3	2	2	2	3	3
3	2	2	2	3	2	2	2	0	3	3	2	3	3	3	3	3	3	3	3	1	3	2	2	3	3	3	2	2	2	3	3	0	2	2	3	2	2	2	3	3	0	3	2	0	3	1	0	3	2
2	2	2	2	2	0	2	0	2	2	2	2	2	2	2	0	3	2	2	2	1	3	0	3	0	2	3	2	3	3	2	2	3	2	2	1	3	1	3	2	3	3	3	2	2	2	3	2	2	3
2	2	3	3	0	2	2	3	3	2	2	3	2	3	2	2	2	3	3	2	2	2	3	3	1	2	2	3	3	3	3	2	2	3	2	3	2	2	3	3	2	3	3	3	2	0	3	3	2	0
3	3	3	2	2	2	3	1	2	3	0	3	3	2	3	2	3	0	2	0	1	3	3	2	0	3	2	2	3	3	2	1	2	2	2	3	3	2	2	3	3	2	2	3	2	3	3	3	2	3
3	2	2	3	0	3	3	2	3	3	2	1	3	0	1	2	3	3	2	3	3	2	2	2	3	2	2	2	2	0	1	3	3	3	2	3	2	3	2	2	0	3	2	3	2	2	2	3	3	3
1	2	1	1	2	0	2	3	2	0	2	3	2	3	2	3	2	2	2	2	2	2	2	2	2	3	3	2	2	2	0	3	3	3	3	3	2	3	3	2	2	2	2	2	2	2	3	2	2	3
2	2	2	1	2	3	2	2	2	3	2	3	2	3	2	2	2	3	2	1	3	0	3	2	3	3	3	3	2	3	3	3	0	2	3	1	3	1	2	3	2	3	2	3	3	2	3	3	3	2
0	2	2	2	3	3	3	3	3	2	3	3	2	2	2	3	3	3	3	3	1	2	2	3	1	2	2	3	2	2	3	2	3	3	3	1	2	3	2	2	2	3	2	2	0	2	3	3	2	3
2	2	3	2	3	2	3	3	2	3	2	0	2	2	2	2	2	2	2	3	3	3	3	2	3	3	3	2	3	2	2	3	2	2	3	3	1	3	2	2	3	3	0	3	3	2	2	3	3	2
3	3	2	2	3	3	3	3	2	2	2	3	0	3	2	2	0	2	2	3	2	2	2	3	2	3	0	2	3	2	3	2	3	2	2	2	3	2	2	2	2	3	2	3	2	3	3	2	3	2
3	3	3	3	3	2	3	3	3	3	3	2	3	3	3	3	2	2	3	0	2	3	2	2	3	3	3	3	3	3	2	3	2	2	2	3	2	2	3	3	3	2	2	2	3	3	2	2	1	0
2	1	1	2	3	3	3	2	3	2	2	2	3	2	2	2	2	1	3	3	2	0	2	2	2	2	2	3	3	2	3	2	1	0	2	3	2	2	3	0	3	2	2	2	0	2	2	3	2	2
2	0	2	2	3	2	3	2	1	3	2	2	2	2	2	3	2	3	0	3	3	0	3	3	2	3	3	3	2	2	3	3	2	0	2	2	3	3	3	2	3	3	3	3	2	3	3	3	2	3
3	3	1	2	3	3	3	2	2	2	0	3	0	2	2	3	0	2	3	3	3	2	3	2	2	2	3	3	3	3	1	0	2	3	2	3	3	3	3	2	2	2	3	3	3	3	3	2	3	3
2	3	2	3	2	3	3	2	2	2	3	2	3	3	2	3	3	3	3	2	3	2	3	3	2	1	2	2	2	2	3	2	2	2	2	3	0	2	2	2	2	3	3	3	2	2	2	2	3	3
3	2	2	1	2	2	3	2	1	2	3	0	0	3	2	1	3	0	3	3	3	3	2	3	2	2	3	3	3	1	3	2	2	3	2	3	2	0	2	3	3	3	3	3	3	0	3	2	3	3
2	2	2	2	3	2	3	2	0	2	2	3	3	2	2	2	3	2	3	2	3	2	2	2	3	2	3	0	2	1	3	0	2	2	3	3	3	3	3	3	2	3	3	2	2	3	3	2	2	0
2	2	2	2	3	3	3	3	2	2	3	3	3	2	0	3	2	2	3	2	1	3	2	2	2	3	3	0	2	2	3	1	3	2	3	3	3	3	3	3	0	2	2	2	3	2	2	2	3	3
2	3	3	2	3	2	2	2	2	2	3	3	3	3	3	3	3	3	3	3	2	3	3	3	3	2	2	3	3	3	3	3	3	2	2	3	2	2	2	2	3	0	2	3	2	3	3	3	3	3
3	3	3	3	0	3	2	0	2	2	2	1	3	3	2	2	3	0	1	2	3	2	2	2	3	2	2	3	2	3	1	2	2	3	2	2	2	1	0	2	3	2	3	3	2	2	2	3	2	2
3	3	3	2	3	3	0	3	1	0	1	3	2	0	3	2	2	2	3	2	3	2	3	2	2	2	3	3	3	3	2	2	3	2	2	3	2	2	3	3	2	2	2	3	2	2	3	3	2	3
2	2	3	2	2	2	2	2	3	3	2	3	2	3	2	3	0	3	2	2	3	2	0	2	3	2	1	2	2	3	3	3	3	3	3	1	2	3	3	2	3	2	3	2	3	3	3	2	2	3
3	2	0	3	3	2	3	2	3	2	2	0	3	2	1	0	3	1	2	2	2	3	3	2	3	3	3	2	2	3	3	2	3	2	3	2	2	2	3	2	2	2	1	3	3	3	2	3	2	3
2	3	3	3	2	2	3	3	3	2	2	3	3	3	3	2	3	2	2	3	2	3	0	2	3	1	1	3	2	2	2	3	3	3	2	3	3	3	2	2	3	2	3	0	1	2	2	3	2	2
3	2	2	2	3	2	3	2	3	3	3	0	3	3	3	2	2	2	0	2	2	0	3	3	3	3	3	1	3	2	2	2	2	2	2	2	2	3	2	1	3	3	2	2	3	2	3	2	3	3
3	2	3	2	3	2	3	2	2	3	3	3	3	2	2	3	2	2	3	2	2	3	2	2	2	2	1	1	3	3	2	2	3	0	2	3	2	3	1	2	3	2	2	3	3	2	3	3	2	2
2	2	3	1	3	3	3	3	2	2	2	3	3	2	2	3	3	3	3	2	3	3	3	2	1	2	3	3	3	2	1	2	2	3	3	2	2	3	3	3	3	2	3	2	3	2	3	2	2	2
2	3	1	3	3	2	2	0	2	3	3	0	2	3	3	2	2	3	3	2	2	0	2	2	3	2	3	2	2	2	1	3	3	2	2	2	0	2	2	2	3	2	1	3	3	3	2	2	2	2
3	0	2	1	3	3	2	3	3	0	2	2	3	3	2	2	2	2	2	2	2	2	2	3	3	2	0	2	2	1	2	3	2	3	3	2	0	3	3	2	3	3	3	3	2	2	3	0	3	2
[truncated: 50 more columns]

## Sheet: MCS=3
1	3	3	3	3	3	3	3	3	3	3	3	1	3	0	3	3	3	3	3	3	1	3	3	3	3	1	3	3	3	3	3	3	3	3	3	3	3	3	3	3	3	3	3	3	3	3	3	3	3
3	3	3	3	3	3	3	3	3	3	1	3	3	3	3	3	3	3	3	3	3	3	3	3	3	3	3	3	3	3	3	3	3	3	3	3	3	3	3	3	3	3	3	3	3	3	3	3	3	3
1	3	3	3	3	3	3	1	3	3	3	3	3	3	3	3	3	1	1	3	3	3	3	3	3	1	3	3	3	3	3	3	3	3	3	3	1	3	3	1	3	3	3	3	1	1	3	3	3	3
3	1	3	3	3	3	3	3	3	3	3	3	3	3	1	3	1	3	3	3	3	3	3	3	3	3	1	3	3	3	3	3	3	3	3	3	3	3	3	3	3	3	3	3	3	3	3	3	3	3
3	3	3	3	3	3	3	3	3	3	3	3	3	3	3	3	3	3	3	3	3	3	3	3	3	3	3	3	3	3	3	3	3	3	3	3	3	3	3	3	3	1	3	3	3	3	3	3	3	3
3	3	3	3	3	3	1	3	3	3	3	3	3	3	3	3	3	3	3	3	3	3	1	3	3	3	3	3	1	3	3	3	3	3	3	3	3	3	3	3	3	1	3	3	3	1	3	3	3	3
3	3	3	3	3	3	3	3	3	3	3	3	3	3	3	1	3	3	3	1	3	3	3	3	3	3	3	3	3	3	3	3	3	3	3	3	3	3	1	3	3	3	3	3	3	3	3	3	1	1
3	3	3	3	1	3	3	3	3	3	3	3	3	3	3	3	3	3	3	3	1	3	3	3	3	3	3	3	3	3	3	3	3	3	3	3	3	3	3	3	3	3	3	3	1	3	3	1	3	3
3	3	3	3	3	3	3	3	1	3	1	1	3	1	3	3	3	3	3	3	1	3	3	3	3	3	3	3	3	3	3	3	3	3	3	3	3	3	3	3	3	3	3	1	3	3	3	3	3	3
3	3	3	1	3	3	3	3	3	3	3	3	3	3	3	3	1	3	3	3	3	3	3	3	3	3	3	3	3	3	3	3	3	3	3	3	3	3	3	3	3	3	3	3	3	3	3	3	3	1
3	3	3	3	3	3	3	3	3	3	1	3	3	3	3	3	3	3	1	3	3	3	3	3	3	3	3	3	3	3	3	3	3	3	3	3	3	3	1	3	3	3	3	3	3	3	3	3	3	3
3	3	3	3	3	3	3	3	3	3	3	3	1	3	3	3	3	3	3	3	1	3	3	3	3	1	3	3	3	3	3	3	3	3	3	1	3	3	3	3	3	3	3	3	3	3	3	3	3	1
3	3	3	3	3	3	3	3	3	3	3	3	3	3	3	3	3	3	3	3	1	3	3	1	3	3	3	3	3	3	3	3	3	3	3	3	3	3	1	3	1	3	3	3	3	3	3	3	3	3
3	3	3	3	3	3	3	1	3	3	3	1	3	3	3	3	3	3	3	3	3	3	3	1	3	3	3	3	1	3	3	3	3	3	3	3	3	3	3	3	3	1	3	3	3	3	1	3	3	3
3	3	3	3	3	3	1	3	3	3	3	3	3	3	3	1	3	3	3	3	3	3	3	3	3	3	3	3	3	3	3	3	3	3	3	3	3	3	3	3	3	3	3	3	1	3	3	3	3	3
3	1	3	3	3	3	3	3	1	3	3	3	3	3	3	3	3	3	3	3	3	1	3	3	3	3	3	3	3	3	3	3	3	3	1	3	3	3	3	3	3	3	3	3	3	3	3	3	3	3
3	1	3	3	1	3	3	3	3	3	3	3	3	3	3	3	3	3	3	3	3	3	3	3	3	3	1	3	3	3	3	3	3	3	3	3	3	1	3	3	3	1	3	1	3	3	3	3	3	3
3	3	3	3	3	3	3	3	3	3	1	3	3	3	3	3	3	1	3	3	3	1	3	3	3	3	3	3	3	3	3	3	3	3	3	3	3	3	1	3	3	3	3	3	3	3	3	3	3	3
3	3	3	3	3	3	3	3	3	3	3	3	3	3	3	3	3	3	3	1	3	3	3	3	3	3	3	3	3	1	3	3	3	3	3	3	3	3	3	3	3	3	3	3	3	3	3	3	3	3
3	3	3	3	3	3	3	3	3	3	3	3	1	1	3	3	3	3	3	3	3	3	3	3	1	3	3	3	1	3	3	3	3	3	3	3	3	3	3	3	3	3	3	3	3	3	1	1	3	3
3	3	3	3	3	1	3	3	1	3	3	3	3	3	3	1	3	3	3	1	3	3	3	3	0	3	3	3	3	3	3	3	3	3	3	3	3	1	3	3	3	3	2	3	3	1	1	3	3	3
3	3	1	2	3	1	3	3	3	3	3	3	1	3	3	1	3	3	3	3	3	3	3	3	3	3	3	3	3	3	3	3	1	3	3	3	3	3	3	3	3	2	0	2	3	3	3	3	3	3
3	3	0	3	3	3	3	3	1	3	3	3	1	3	3	3	3	3	3	3	3	3	3	3	0	1	3	3	3	3	3	3	3	3	3	3	3	3	3	3	3	2	0	2	2	3	3	1	3	3
3	3	3	3	3	1	3	3	3	3	3	3	3	3	3	3	3	3	3	3	3	3	3	1	2	3	3	1	3	3	3	1	3	3	3	3	3	3	3	3	3	3	0	2	0	0	3	1	3	3
3	3	3	1	3	3	3	3	3	3	3	3	1	3	3	3	3	3	3	3	1	3	1	3	3	3	3	3	3	3	3	3	3	3	3	3	1	3	3	3	3	3	3	3	2	3	3	3	3	3
3	3	3	3	3	3	3	3	3	3	3	3	3	3	3	3	3	3	3	3	3	3	3	1	3	3	1	3	3	3	3	3	3	3	3	3	3	3	3	3	3	3	3	3	3	3	3	3	3	3
3	3	3	3	3	3	3	3	3	3	3	1	1	3	3	3	3	3	3	3	3	3	1	3	3	3	1	3	3	3	3	3	3	3	3	3	3	3	3	3	1	1	3	1	3	3	3	3	3	3
1	3	3	3	3	1	3	3	3	3	1	3	3	3	3	3	3	3	3	3	3	3	3	3	3	1	2	3	3	3	3	3	3	3	3	3	3	3	3	3	3	1	3	3	3	3	1	3	3	3
3	3	3	1	3	3	3	3	3	3	3	3	3	3	3	3	3	3	3	3	3	1	3	3	3	2	0	2	3	3	3	3	3	3	3	3	3	3	3	3	3	3	1	3	3	3	3	3	1	3
3	3	3	3	3	3	3	3	3	1	3	3	3	3	3	1	3	3	3	3	3	3	3	3	3	3	2	3	3	3	3	1	3	3	3	3	3	3	3	3	1	3	3	3	3	3	3	3	3	3
3	3	3	3	3	3	3	3	3	3	3	3	3	3	3	3	3	3	3	1	3	3	3	3	3	3	0	3	3	3	3	3	3	3	3	1	3	3	3	3	3	3	3	3	3	3	3	3	3	3
3	3	3	3	3	3	3	3	3	3	3	3	3	3	3	3	3	3	3	0	1	3	3	3	3	3	2	3	3	3	3	3	3	3	1	3	3	3	3	3	3	3	3	3	3	3	3	3	3	3
3	3	3	3	3	3	3	3	3	3	3	3	3	3	3	3	3	3	3	0	2	3	1	3	3	3	3	3	3	3	3	3	3	1	3	1	3	3	3	3	3	3	1	3	1	3	3	3	1	3
3	3	3	3	3	3	3	3	3	3	3	3	3	2	3	3	3	1	3	2	1	3	3	3	3	3	3	3	3	1	3	3	3	3	3	3	3	3	3	3	3	3	3	3	3	3	3	3	3	3
3	3	3	3	3	3	3	3	3	3	3	3	0	0	2	3	3	3	3	3	3	3	3	3	3	3	1	3	3	3	3	3	3	3	3	3	3	3	3	3	3	3	3	3	3	3	3	1	3	1
3	3	1	3	2	3	3	3	3	1	3	3	3	2	3	3	3	3	3	3	3	3	3	3	3	1	3	3	3	3	3	3	3	3	3	3	3	3	3	3	3	3	3	3	3	3	3	1	3	3
3	3	3	0	0	2	3	3	3	3	3	3	3	3	3	3	3	3	3	3	1	3	3	3	3	3	3	3	3	3	3	3	3	3	3	3	3	3	3	3	3	3	1	3	3	1	3	3	1	3
3	3	3	1	2	3	3	3	3	3	3	1	3	3	3	3	1	3	3	3	3	3	3	3	3	1	3	3	3	3	3	3	3	3	3	3	3	1	3	3	3	3	3	3	3	3	1	3	3	3
3	3	1	3	3	3	3	3	3	3	3	3	3	3	3	3	3	1	3	3	3	3	3	3	3	3	3	3	3	3	3	3	3	3	3	3	3	3	3	3	3	1	1	3	3	3	3	3	1	3
3	3	1	3	3	3	3	3	3	1	3	3	3	3	3	3	3	3	3	3	3	3	3	3	3	1	3	3	3	3	3	3	3	1	1	3	3	3	3	3	3	3	3	3	3	3	3	3	3	3
3	3	3	3	3	3	3	3	3	1	3	3	3	3	3	3	3	3	3	3	3	3	3	1	3	1	3	3	3	3	3	3	3	3	3	3	3	3	3	3	3	1	3	3	3	3	3	3	3	3
0	2	3	3	3	3	3	3	3	3	3	1	3	3	3	3	3	3	3	3	3	3	3	3	1	3	3	3	1	3	1	3	3	3	3	3	3	3	3	3	1	3	3	3	1	3	3	1	3	3
2	0	2	3	1	3	3	3	3	1	1	3	3	3	3	3	3	3	3	3	3	0	3	3	3	3	1	3	3	3	3	3	3	3	3	3	1	3	3	3	3	3	3	3	3	3	3	3	3	1
3	0	1	3	3	3	3	3	3	3	3	3	3	3	3	3	3	3	3	3	3	3	3	3	3	3	1	1	3	1	3	3	3	3	3	3	3	3	3	3	3	3	3	3	3	3	3	3	1	3
3	3	3	3	3	3	3	3	3	3	3	3	1	3	1	1	3	3	3	1	3	3	3	3	3	1	3	3	3	3	3	3	3	3	3	3	3	3	3	3	3	3	3	3	3	3	3	3	3	3
3	3	1	1	3	3	3	3	3	3	3	3	1	3	3	3	3	3	3	3	3	3	3	3	3	3	3	3	3	3	1	3	3	3	3	3	3	3	3	3	3	3	3	1	3	3	3	3	3	3
3	3	3	1	3	3	3	3	1	3	3	3	3	3	3	3	3	3	3	1	3	3	3	1	3	3	3	3	3	3	3	3	3	3	3	3	3	1	3	3	1	3	3	3	3	3	3	3	3	1
3	2	3	3	3	3	3	3	3	3	3	3	3	3	3	3	3	3	3	3	3	3	3	1	3	3	3	3	3	3	3	3	3	3	3	3	3	3	3	3	3	3	1	3	3	3	3	1	3	3
2	0	2	3	3	3	3	3	3	3	3	3	3	1	3	3	3	3	3	3	3	3	3	1	3	3	3	3	3	3	3	3	3	3	3	1	3	3	3	3	3	3	3	3	3	3	3	3	3	3
3	2	3	3	3	3	3	3	1	1	3	3	3	3	3	3	3	3	3	1	3	3	3	3	3	3	3	3	3	3	3	1	3	3	3	3	3	1	3	3	3	1	3	3	3	3	3	3	3	3
3	3	3	3	3	3	3	3	3	3	3	1	3	3	3	3	3	3	3	1	3	3	3	3	3	3	3	3	3	3	3	3	3	3	3	3	3	3	3	3	3	3	3	3	3	3	3	3	3	1
3	3	3	3	1	1	3	3	3	3	3	3	3	1	3	3	3	3	3	3	3	1	3	3	3	3	3	3	3	3	3	3	3	3	3	3	3	3	3	3	3	3	3	3	3	3	3	3	3	3
3	3	3	3	3	3	3	3	3	3	3	3	3	1	3	3	3	3	3	3	3	3	3	3	3	3	3	3	3	3	3	3	3	3	3	3	3	3	3	3	3	3	3	3	3	3	3	3	3	3
3	3	3	3	1	3	3	3	3	3	3	3	3	3	3	3	3	3	3	3	3	3	3	3	1	3	3	3	3	3	3	3	3	3	3	3	3	3	3	1	3	1	3	3	3	3	3	3	3	3
3	3	1	3	3	3	3	3	3	3	3	3	3	3	3	3	3	3	3	3	3	3	3	3	3	3	1	1	3	3	3	3	3	3	3	3	3	1	3	3	3	3	3	3	3	3	3	3	3	3
1	3	1	3	3	3	3	3	1	3	3	3	3	3	3	3	3	3	3	3	3	3	3	3	3	3	3	3	3	3	3	3	3	3	3	3	3	3	3	3	3	3	3	3	3	3	3	2	3	3
3	3	3	3	3	3	3	3	3	3	3	3	3	3	3	3	3	3	3	3	3	3	3	3	3	3	3	3	3	3	3	3	3	3	3	3	3	3	3	3	3	1	3	1	3	3	2	0	2	3
3	3	3	3	3	3	3	3	3	1	3	3	3	3	3	3	1	3	3	1	1	3	3	3	3	3	3	1	3	3	3	3	3	1	3	3	3	3	3	1	3	3	3	3	3	3	3	2	1	3
3	3	3	3	3	3	3	3	3	3	3	3	3	1	3	1	3	3	3	3	3	3	3	3	3	3	3	3	3	3	3	1	3	3	3	3	1	3	3	3	3	3	3	3	3	3	3	1	3	3
3	3	3	1	3	3	3	2	3	3	3	3	3	3	3	3	3	3	3	3	1	3	3	3	3	3	3	3	3	3	3	3	1	3	3	3	3	1	3	3	3	3	3	3	3	1	1	3	3	3
3	3	3	3	3	3	2	0	0	3	3	3	3	3	1	3	3	3	1	3	3	3	3	3	1	3	3	3	1	3	3	3	3	3	3	3	3	3	3	3	3	3	3	3	3	1	3	3	3	1
3	3	3	3	3	3	3	2	3	3	3	3	3	3	3	3	3	3	3	3	3	3	3	3	3	1	3	3	3	3	3	3	3	3	3	3	3	1	3	3	3	3	3	3	3	3	3	3	3	3
3	3	3	3	3	3	3	3	3	1	3	1	3	3	3	3	3	3	3	3	3	3	3	3	3	3	3	3	3	3	3	1	3	1	3	3	3	3	3	3	3	3	3	3	3	3	1	3	3	3
3	3	3	3	3	3	3	3	3	3	3	0	1	3	3	3	3	3	3	3	3	3	3	3	3	3	1	3	3	3	1	3	3	3	3	3	1	3	3	3	3	2	0	1	3	3	3	3	3	3
3	3	3	3	3	3	3	3	1	3	3	3	0	3	3	3	3	3	3	3	3	3	3	3	1	3	3	3	3	3	3	3	3	3	1	3	1	3	3	1	2	0	2	3	3	3	3	3	3	3
3	3	1	3	3	3	3	3	3	3	1	3	3	3	3	3	3	3	3	3	1	1	3	3	3	3	3	3	3	1	3	3	3	3	3	3	3	1	3	3	3	2	3	3	3	3	1	3	3	3
3	3	3	3	3	3	3	3	3	3	3	3	3	3	3	3	3	3	3	3	3	3	3	3	3	3	3	3	3	3	3	3	1	3	3	3	3	3	1	3	3	3	3	3	3	3	3	3	3	3
3	3	3	3	3	3	3	3	3	3	3	3	3	3	3	3	3	3	1	3	3	1	1	3	3	3	2	3	3	3	3	1	3	3	3	3	3	3	3	3	3	3	3	3	3	3	1	3	3	3
1	3	3	3	3	3	3	3	3	3	3	3	3	3	3	3	3	3	3	3	3	3	1	1	3	0	0	0	3	3	3	3	1	3	3	3	3	3	3	3	3	1	3	1	3	3	3	3	3	1
3	3	3	3	3	3	3	3	3	3	3	3	3	3	3	3	1	3	3	3	1	3	3	3	3	3	2	3	3	3	3	3	3	3	3	3	3	3	3	3	3	3	3	1	3	3	3	3	3	3
3	3	3	3	3	3	3	3	3	3	3	3	3	3	3	3	3	3	3	3	3	3	3	3	3	1	3	3	1	3	3	3	1	3	3	3	3	3	3	3	3	3	3	3	3	3	3	3	3	3
3	3	3	3	3	3	3	3	1	3	3	3	3	3	3	3	3	3	3	3	1	3	3	3	3	3	3	3	3	3	3	3	1	3	3	3	3	3	3	3	3	1	3	3	1	3	1	1	3	3
3	3	3	3	3	0	3	1	3	3	3	3	3	3	3	1	3	3	3	3	1	3	1	3	1	3	3	3	3	3	3	3	3	3	3	1	3	1	3	3	3	3	3	3	3	3	3	3	3	3
3	3	3	3	1	3	3	3	3	3	3	3	3	3	3	3	3	3	3	3	3	3	3	3	1	3	3	3	3	3	3	3	3	3	3	3	3	3	3	3	3	3	3	3	3	1	3	3	3	1
3	3	3	3	3	3	3	1	3	3	1	3	3	3	3	3	3	1	3	1	1	3	3	3	1	3	3	3	3	3	3	1	3	3	3	3	3	3	3	3	3	3	3	3	3	3	3	3	3	3
3	3	3	3	1	3	3	3	3	3	3	1	3	1	1	3	3	3	3	3	3	3	3	3	3	3	3	3	3	1	1	3	3	3	3	3	3	3	3	3	1	3	3	3	3	3	3	3	3	3
1	3	1	1	3	1	3	3	3	1	3	3	3	3	3	3	3	3	3	3	3	3	3	3	3	3	3	3	3	3	1	3	3	3	3	3	3	3	3	3	3	3	3	3	3	3	3	3	3	3
2	3	3	1	3	3	3	3	3	3	3	3	3	3	3	3	3	3	3	1	3	1	3	3	3	3	3	3	3	3	3	3	1	3	3	1	3	1	3	3	3	3	3	3	3	3	3	3	3	3
0	2	3	3	3	3	3	3	3	3	3	3	3	3	3	3	3	3	3	3	1	3	3	3	1	3	3	3	3	3	3	3	3	3	3	1	3	3	3	3	3	3	3	3	1	3	3	3	3	3
2	3	3	3	3	3	3	3	3	3	3	1	3	3	3	3	2	3	3	3	3	3	3	3	3	3	3	3	3	3	3	3	3	3	3	3	1	3	3	3	3	3	1	3	3	3	3	3	3	3
3	3	3	3	3	3	3	3	3	3	3	3	1	3	3	2	0	2	3	3	3	3	3	3	3	3	1	3	3	3	3	3	3	3	3	3	3	3	3	3	3	3	3	3	3	3	3	3	3	3
3	3	3	3	3	3	3	3	3	3	3	3	3	3	3	3	2	3	3	1	3	3	3	3	3	3	3	3	3	3	3	3	3	3	3	3	3	3	3	3	3	3	3	3	3	3	3	3	0	0
3	1	1	3	3	3	3	3	3	3	3	3	3	3	3	3	3	1	3	3	3	1	3	3	3	3	3	3	3	3	3	3	1	0	3	3	3	3	3	1	3	3	3	3	1	3	3	3	3	2
3	1	3	3	3	3	3	3	1	3	3	3	3	3	3	3	3	3	1	3	3	1	3	3	3	3	3	3	3	3	3	3	2	0	3	3	3	3	3	3	3	3	3	3	3	3	3	3	3	3
3	3	1	3	3	3	3	3	3	3	1	3	1	3	3	3	1	3	3	3	3	3	3	3	3	3	3	3	3	3	1	1	3	3	3	3	3	3	3	3	3	3	3	3	3	3	3	3	3	3
3	3	3	3	3	3	3	3	3	3	3	3	3	3	3	3	3	3	3	3	3	3	3	3	3	1	3	3	3	3	3	3	3	3	3	3	1	3	3	3	3	3	3	3	3	3	3	3	3	3
3	3	3	1	3	3	3	3	0	3	3	1	1	3	3	1	3	1	3	3	3	3	3	3	3	3	3	3	3	1	3	3	3	3	3	3	3	1	3	3	3	3	3	3	3	1	3	3	3	3
3	3	3	3	3	3	3	2	0	2	3	3	3	3	3	3	3	3	3	3	3	3	3	3	3	3	3	1	3	1	3	1	3	3	3	3	3	3	3	3	3	3	3	3	3	3	3	3	3	1
3	3	3	3	3	3	3	3	2	3	3	3	3	3	1	3	3	3	3	3	1	3	3	3	3	3	3	1	3	3	3	1	3	3	3	3	3	3	3	3	1	3	3	3	3	3	3	3	3	3
3	3	3	3	3	3	3	3	3	3	3	3	3	3	3	3	3	3	3	3	3	3	3	3	3	3	3	3	3	3	3	3	3	3	3	3	3	3	3	3	3	1	3	3	3	3	3	3	3	3
3	3	3	3	1	3	3	0	2	3	3	1	3	3	3	3	3	1	1	3	3	3	3	3	3	3	3	3	3	3	1	3	3	3	3	3	3	1	1	3	3	3	3	3	3	3	3	3	3	3
3	3	3	3	3	3	1	2	0	0	1	3	3	1	3	3	3	3	3	3	3	3	3	3	3	3	3	3	3	3	3	3	3	3	3	3	3	3	3	3	3	3	3	3	3	3	3	3	3	3
3	3	3	3	3	3	3	3	3	3	3	3	3	3	3	3	1	3	3	3	3	3	1	3	3	3	1	3	3	3	3	3	3	3	3	1	3	3	3	3	3	3	3	3	3	3	3	3	3	3
3	3	1	3	3	3	3	3	3	3	3	1	3	3	1	1	3	1	3	3	3	3	3	3	3	3	3	3	3	3	3	3	3	3	3	3	3	3	3	3	3	3	1	3	3	3	3	3	3	3
3	3	3	3	3	3	3	3	3	3	3	3	3	3	3	3	3	3	3	3	3	3	1	3	3	1	1	3	3	3	3	3	3	3	3	3	3	3	3	3	3	3	3	1	1	3	3	3	3	3
3	3	3	3	3	3	3	3	3	3	3	1	3	3	3	3	3	3	1	3	3	1	3	3	3	3	3	1	3	3	3	3	3	3	3	3	3	3	3	1	3	3	3	3	3	3	3	3	3	3
3	3	3	3	3	3	3	3	3	3	3	3	3	3	3	3	3	3	3	3	3	3	3	3	3	3	1	1	3	3	3	3	3	1	3	3	3	3	1	3	3	3	3	3	3	3	3	3	3	3
3	3	3	1	3	3	3	3	3	3	3	3	3	3	3	3	3	3	3	3	3	3	3	3	1	3	3	3	3	3	1	3	3	3	3	3	2	3	3	3	3	3	3	3	3	3	3	3	3	3
3	3	1	3	3	3	3	1	3	3	3	1	3	3	3	3	3	3	3	3	3	1	3	3	3	3	3	3	3	3	1	3	3	3	3	2	0	2	3	3	3	3	1	3	3	3	3	3	3	3
3	1	3	1	3	3	3	3	3	1	3	3	3	3	3	3	3	3	3	3	3	3	3	3	3	3	1	3	3	1	3	3	3	3	3	3	0	3	3	3	3	3	3	3	3	3	3	1	3	3
[truncated: 50 more columns]

## Sheet: MCS=100
1	3	3	3	3	3	3	3	3	3	3	3	1	3	1	3	3	3	3	3	3	1	3	3	3	3	1	3	3	3	3	3	3	3	3	3	3	3	3	3	3	3	3	3	3	3	3	3	3	3
3	3	3	3	3	3	3	3	3	3	1	3	3	3	3	3	3	3	3	3	3	3	3	3	3	3	3	3	3	3	3	3	3	3	3	3	3	3	3	3	3	3	3	3	3	3	3	3	3	3
1	3	3	3	3	3	3	1	3	3	3	3	3	3	3	3	3	1	1	3	3	3	3	3	3	1	3	3	3	3	3	3	3	3	3	3	1	3	3	1	3	3	3	3	1	1	3	3	3	3
3	1	3	3	3	3	3	3	3	3	3	3	3	3	1	3	1	3	3	3	3	3	3	3	3	3	1	3	3	3	3	3	3	3	3	3	3	3	3	3	3	3	3	3	3	3	3	3	3	3
3	3	3	3	3	3	3	3	3	3	3	3	3	3	3	3	3	3	3	3	3	3	3	3	3	3	3	3	3	3	3	3	3	3	3	3	3	3	3	3	3	1	3	3	3	3	3	3	3	3
3	3	3	3	3	3	1	3	3	3	3	3	3	3	3	3	3	3	3	3	3	3	1	3	3	3	3	3	1	3	3	3	3	3	3	3	3	3	3	3	3	1	3	3	3	1	3	3	3	3
3	3	3	3	3	3	3	3	3	3	3	3	3	3	3	1	3	3	3	1	3	3	3	3	3	3	3	3	3	3	3	3	3	3	3	3	3	3	1	3	3	3	3	3	3	3	3	3	1	1
3	3	3	3	1	3	3	3	3	3	3	3	3	3	3	3	3	3	3	3	1	3	3	3	3	3	3	3	3	3	3	3	3	3	3	3	3	3	3	3	3	3	3	3	1	3	3	1	3	3
3	3	3	3	3	3	3	3	1	3	1	1	3	1	3	3	3	3	3	3	1	3	3	3	3	3	3	3	3	3	3	3	3	3	3	3	3	3	3	3	3	3	3	1	3	3	3	3	3	3
3	3	3	1	3	3	3	3	3	3	3	3	3	3	3	3	1	3	3	3	3	3	3	3	3	3	3	3	3	3	3	3	3	3	3	3	3	3	3	3	3	3	3	3	3	3	3	3	3	1
3	3	3	3	3	3	3	3	3	3	1	3	3	3	3	3	3	3	1	3	3	3	3	3	3	3	3	3	3	3	3	3	3	3	3	3	3	3	1	3	3	3	3	3	3	3	3	3	3	3
3	3	3	3	3	3	3	3	3	3	3	3	1	3	3	3	3	3	3	3	1	3	3	3	3	1	3	3	3	3	3	3	3	3	3	1	3	3	3	3	3	3	3	3	3	3	3	3	3	1
3	3	3	3	3	3	3	3	3	3	3	3	3	3	3	3	3	3	3	3	1	3	3	1	3	3	3	3	3	3	3	3	3	3	3	3	3	3	1	3	1	3	3	3	3	3	3	3	3	3
3	3	3	3	3	3	3	1	3	3	3	1	3	3	3	3	3	3	3	3	3	3	3	1	3	3	3	3	1	3	3	3	3	3	3	3	3	3	3	3	3	1	3	3	3	3	1	3	3	3
3	3	3	3	3	3	1	3	3	3	3	3	3	3	3	1	3	3	3	3	3	3	3	3	3	3	3	3	3	3	3	3	3	3	3	3	3	3	3	3	3	3	3	3	1	3	3	3	3	3
3	1	3	3	3	3	3	3	1	3	3	3	3	3	3	3	3	3	3	3	3	1	3	3	3	3	3	3	3	3	3	3	3	3	1	3	3	3	3	3	3	3	3	3	3	3	3	3	3	3
3	1	3	3	1	3	3	3	3	3	3	3	3	3	3	3	3	3	3	3	3	3	3	3	3	3	1	3	3	3	3	3	3	3	3	3	3	1	3	3	3	1	3	1	3	3	3	3	3	3
3	3	3	3	3	3	3	3	3	3	1	3	3	3	3	3	3	1	3	3	3	1	3	3	3	3	3	3	3	3	3	3	3	3	3	3	3	3	1	3	3	3	3	3	3	3	3	3	3	3
3	3	3	3	3	3	3	3	3	3	3	3	3	3	3	3	3	3	3	1	3	3	3	3	3	3	3	3	3	1	3	3	3	3	3	3	3	3	3	3	3	3	3	3	3	3	3	3	3	3
3	3	3	3	3	3	3	3	3	3	3	3	1	1	3	3	3	3	3	3	3	3	3	3	1	3	3	3	1	3	3	3	3	3	3	3	3	3	3	3	3	3	3	3	3	3	1	1	3	3
3	3	3	3	3	1	3	3	1	3	3	3	3	3	3	1	3	3	3	1	3	3	3	3	1	3	3	3	3	3	3	3	3	3	3	3	3	1	3	3	3	3	2	3	3	1	1	3	3	3
3	3	1	3	3	1	3	3	3	3	3	3	1	3	3	1	3	3	3	3	3	3	3	3	3	3	3	3	3	3	3	3	1	3	3	3	3	3	3	3	3	2	0	2	3	3	3	3	3	3
3	3	1	3	3	3	3	3	1	3	3	3	1	3	3	3	3	3	3	3	3	3	3	3	1	1	3	3	3	3	3	3	3	3	3	3	3	3	3	3	3	2	0	2	2	3	3	1	3	3
3	3	3	3	3	1	3	3	3	3	3	3	3	3	3	3	3	3	3	3	3	3	3	1	3	3	3	1	3	3	3	1	3	3	3	3	3	3	3	3	3	3	0	2	0	0	3	1	3	3
3	3	3	1	3	3	3	3	3	3	3	3	1	3	3	3	3	3	3	3	1	3	1	3	3	3	3	3	3	3	3	3	3	3	3	3	1	3	3	3	3	3	3	3	2	3	3	3	3	3
3	3	3	3	3	3	3	3	3	3	3	3	3	3	3	3	3	3	3	3	3	3	3	1	3	3	1	3	3	3	3	3	3	3	3	3	3	3	3	3	3	3	3	3	3	3	3	3	3	3
3	3	3	3	3	3	3	3	3	3	3	1	1	3	3	3	3	3	3	3	3	3	1	3	3	3	1	3	3	3	3	3	3	3	3	3	3	3	3	3	1	1	3	1	3	3	3	3	3	3
1	3	3	3	3	1	3	3	3	3	1	3	3	3	3	3	3	3	3	3	3	3	3	3	3	1	2	3	3	3	3	3	3	3	3	3	3	3	3	3	3	1	3	3	3	3	1	3	3	3
3	3	3	1	3	3	3	3	3	3	3	3	3	3	3	3	3	3	3	3	3	1	3	3	3	2	0	2	3	3	3	3	3	3	3	3	3	3	3	3	3	3	1	3	3	3	3	3	1	3
3	3	3	3	3	3	3	3	3	1	3	3	3	3	3	1	3	3	3	3	3	3	3	3	3	3	2	3	3	3	3	1	3	3	3	3	3	3	3	3	1	3	3	3	3	3	3	3	3	3
3	3	3	3	3	3	3	3	3	3	3	3	3	3	3	3	3	3	3	1	3	3	3	3	3	3	1	3	3	3	3	3	3	3	3	1	3	3	3	3	3	3	3	3	3	3	3	3	3	3
3	3	3	3	3	3	3	3	3	3	3	3	3	3	3	3	3	3	3	0	1	3	3	3	3	3	3	3	3	3	3	3	3	3	1	3	3	3	3	3	3	3	3	3	3	3	3	3	3	3
3	3	3	3	3	3	3	3	3	3	3	3	3	3	3	3	3	3	3	0	3	3	1	3	3	3	3	3	3	3	3	3	3	1	3	1	3	3	3	3	3	3	1	3	1	3	3	3	1	3
3	3	3	3	3	3	3	3	3	3	3	3	3	2	3	3	3	1	3	3	1	3	3	3	3	3	3	3	3	1	3	3	3	3	3	3	3	3	3	3	3	3	3	3	3	3	3	3	3	3
3	3	3	3	3	3	3	3	3	3	3	3	0	0	2	3	3	3	3	3	3	3	3	3	3	3	1	3	3	3	3	3	3	3	3	3	3	3	3	3	3	3	3	3	3	3	3	1	3	1
3	3	1	3	2	3	3	3	3	1	3	3	3	2	3	3	3	3	3	3	3	3	3	3	3	1	3	3	3	3	3	3	3	3	3	3	3	3	3	3	3	3	3	3	3	3	3	1	3	3
3	3	3	0	0	2	3	3	3	3	3	3	3	3	3	3	3	3	3	3	1	3	3	3	3	3	3	3	3	3	3	3	3	3	3	3	3	3	3	3	3	3	1	3	3	1	3	3	1	3
3	3	3	1	2	3	3	3	3	3	3	1	3	3	3	3	1	3	3	3	3	3	3	3	3	1	3	3	3	3	3	3	3	3	3	3	3	1	3	3	3	3	3	3	3	3	1	3	3	3
3	3	1	3	3	3	3	3	3	3	3	3	3	3	3	3	3	1	3	3	3	3	3	3	3	3	3	3	3	3	3	3	3	3	3	3	3	3	3	3	3	1	1	3	3	3	3	3	1	3
3	3	1	3	3	3	3	3	3	1	3	3	3	3	3	3	3	3	3	3	3	3	3	3	3	1	3	3	3	3	3	3	3	1	1	3	3	3	3	3	3	3	3	3	3	3	3	3	3	3
3	3	3	3	3	3	3	3	3	1	3	3	3	3	3	3	3	3	3	3	3	3	3	1	3	1	3	3	3	3	3	3	3	3	3	3	3	3	3	3	3	1	3	3	3	3	3	3	3	3
0	2	3	3	3	3	3	3	3	3	3	1	3	3	3	3	3	3	3	3	3	3	3	3	1	3	3	3	1	3	1	3	3	3	3	3	3	3	3	3	1	3	3	3	1	3	3	1	3	3
2	0	2	3	1	3	3	3	3	1	1	3	3	3	3	3	3	3	3	3	3	1	3	3	3	3	1	3	3	3	3	3	3	3	3	3	1	3	3	3	3	3	3	3	3	3	3	3	3	1
3	0	1	3	3	3	3	3	3	3	3	3	3	3	3	3	3	3	3	3	3	3	3	3	3	3	1	1	3	1	3	3	3	3	3	3	3	3	3	3	3	3	3	3	3	3	3	3	1	3
3	3	3	3	3	3	3	3	3	3	3	3	1	3	1	1	3	3	3	1	3	3	3	3	3	1	3	3	3	3	3	3	3	3	3	3	3	3	3	3	3	3	3	3	3	3	3	3	3	3
3	3	1	1	3	3	3	3	3	3	3	3	1	3	3	3	3	3	3	3	3	3	3	3	3	3	3	3	3	3	1	3	3	3	3	3	3	3	3	3	3	3	3	1	3	3	3	3	3	3
3	3	3	1	3	3	3	3	1	3	3	3	3	3	3	3	3	3	3	1	3	3	3	1	3	3	3	3	3	3	3	3	3	3	3	3	3	1	3	3	1	3	3	3	3	3	3	3	3	1
3	2	3	3	3	3	3	3	3	3	3	3	3	3	3	3	3	3	3	3	3	3	3	1	3	3	3	3	3	3	3	3	3	3	3	3	3	3	3	3	3	3	1	3	3	3	3	1	3	3
2	0	2	3	3	3	3	3	3	3	3	3	3	1	3	3	3	3	3	3	3	3	3	1	3	3	3	3	3	3	3	3	3	3	3	1	3	3	3	3	3	3	3	3	3	3	3	3	3	3
3	2	3	3	3	3	3	3	1	1	3	3	3	3	3	3	3	3	3	1	3	3	3	3	3	3	3	3	3	3	3	1	3	3	3	3	3	1	3	3	3	1	3	3	3	3	3	3	3	3
3	3	3	3	3	3	3	3	3	3	3	1	3	3	3	3	3	3	3	1	3	3	3	3	3	3	3	3	3	3	3	3	3	3	3	3	3	3	3	3	3	3	3	3	3	3	3	3	3	1
3	3	3	3	1	1	3	3	3	3	3	3	3	1	3	3	3	3	3	3	3	1	3	3	3	3	3	3	3	3	3	3	3	3	3	3	3	3	3	3	3	3	3	3	3	3	3	3	3	3
3	3	3	3	3	3	3	3	3	3	3	3	3	1	3	3	3	3	3	3	3	3	3	3	3	3	3	3	3	3	3	3	3	3	3	3	3	3	3	3	3	3	3	3	3	3	3	3	3	3
3	3	3	3	1	3	3	3	3	3	3	3	3	3	3	3	3	3	3	3	3	3	3	3	1	3	3	3	3	3	3	3	3	3	3	3	3	3	3	1	3	1	3	3	3	3	3	3	3	3
3	3	1	3	3	3	3	3	3	3	3	3	3	3	3	3	3	3	3	3	3	3	3	3	3	3	1	1	3	3	3	3	3	3	3	3	3	1	3	3	3	3	3	3	3	3	3	3	3	3
1	3	1	3	3	3	3	3	1	3	3	3	3	3	3	3	3	3	3	3	3	3	3	3	3	3	3	3	3	3	3	3	3	3	3	3	3	3	3	3	3	3	3	3	3	3	3	2	3	3
3	3	3	3	3	3	3	3	3	3	3	3	3	3	3	3	3	3	3	3	3	3	3	3	3	3	3	3	3	3	3	3	3	3	3	3	3	3	3	3	3	1	3	1	3	3	2	0	2	3
3	3	3	3	3	3	3	3	3	1	3	3	3	3	3	3	1	3	3	1	1	3	3	3	3	3	3	1	3	3	3	3	3	1	3	3	3	3	3	1	3	3	3	3	3	3	3	2	1	3
3	3	3	3	3	3	3	3	3	3	3	3	3	1	3	1	3	3	3	3	3	3	3	3	3	3	3	3	3	3	3	1	3	3	3	3	1	3	3	3	3	3	3	3	3	3	3	1	3	3
3	3	3	1	3	3	3	2	3	3	3	3	3	3	3	3	3	3	3	3	1	3	3	3	3	3	3	3	3	3	3	3	1	3	3	3	3	1	3	3	3	3	3	3	3	1	1	3	3	3
3	3	3	3	3	3	2	0	0	3	3	3	3	3	1	3	3	3	1	3	3	3	3	3	1	3	3	3	1	3	3	3	3	3	3	3	3	3	3	3	3	3	3	3	3	1	3	3	3	1
3	3	3	3	3	3	3	2	3	3	3	3	3	3	3	3	3	3	3	3	3	3	3	3	3	1	3	3	3	3	3	3	3	3	3	3	3	1	3	3	3	3	3	3	3	3	3	3	3	3
3	3	3	3	3	3	3	3	3	1	3	1	3	3	3	3	3	3	3	3	3	3	3	3	3	3	3	3	3	3	3	1	3	1	3	3	3	3	3	3	3	3	3	3	3	3	1	3	3	3
3	3	3	3	3	3	3	3	3	3	3	1	1	3	3	3	3	3	3	3	3	3	3	3	3	3	1	3	3	3	1	3	3	3	3	3	1	3	3	3	3	2	0	1	3	3	3	3	3	3
3	3	3	3	3	3	3	3	1	3	3	3	1	3	3	3	3	3	3	3	3	3	3	3	1	3	3	3	3	3	3	3	3	3	1	3	1	3	3	1	2	0	2	3	3	3	3	3	3	3
3	3	1	3	3	3	3	3	3	3	1	3	3	3	3	3	3	3	3	3	1	1	3	3	3	3	3	3	3	1	3	3	3	3	3	3	3	1	3	3	3	2	3	3	3	3	1	3	3	3
3	3	3	3	3	3	3	3	3	3	3	3	3	3	3	3	3	3	3	3	3	3	3	3	3	3	3	3	3	3	3	3	1	3	3	3	3	3	1	3	3	3	3	3	3	3	3	3	3	3
3	3	3	3	3	3	3	3	3	3	3	3	3	3	3	3	3	3	1	3	3	1	1	3	3	3	2	3	3	3	3	1	3	3	3	3	3	3	3	3	3	3	3	3	3	3	1	3	3	3
1	3	3	3	3	3	3	3	3	3	3	3	3	3	3	3	3	3	3	3	3	3	1	1	3	0	0	0	3	3	3	3	1	3	3	3	3	3	3	3	3	1	3	1	3	3	3	3	3	1
3	3	3	3	3	3	3	3	3	3	3	3	3	3	3	3	1	3	3	3	1	3	3	3	3	3	2	3	3	3	3	3	3	3	3	3	3	3	3	3	3	3	3	1	3	3	3	3	3	3
3	3	3	3	3	3	3	3	3	3	3	3	3	3	3	3	3	3	3	3	3	3	3	3	3	1	3	3	1	3	3	3	1	3	3	3	3	3	3	3	3	3	3	3	3	3	3	3	3	3
3	3	3	3	3	3	3	3	1	3	3	3	3	3	3	3	3	3	3	3	1	3	3	3	3	3	3	3	3	3	3	3	1	3	3	3	3	3	3	3	3	1	3	3	1	3	1	1	3	3
3	3	3	3	3	1	3	1	3	3	3	3	3	3	3	1	3	3	3	3	1	3	1	3	1	3	3	3	3	3	3	3	3	3	3	1	3	1	3	3	3	3	3	3	3	3	3	3	3	3
3	3	3	3	1	3	3	3	3	3	3	3	3	3	3	3	3	3	3	3	3	3	3	3	1	3	3	3	3	3	3	3	3	3	3	3	3	3	3	3	3	3	3	3	3	1	3	3	3	1
3	3	3	3	3	3	3	1	3	3	1	3	3	3	3	3	3	1	3	1	1	3	3	3	1	3	3	3	3	3	3	1	3	3	3	3	3	3	3	3	3	3	3	3	3	3	3	3	3	3
3	3	3	3	1	3	3	3	3	3	3	1	3	1	1	3	3	3	3	3	3	3	3	3	3	3	3	3	3	1	1	3	3	3	3	3	3	3	3	3	1	3	3	3	3	3	3	3	3	3
1	3	1	1	3	1	3	3	3	1	3	3	3	3	3	3	3	3	3	3	3	3	3	3	3	3	3	3	3	3	1	3	3	3	3	3	3	3	3	3	3	3	3	3	3	3	3	3	3	3
2	3	3	1	3	3	3	3	3	3	3	3	3	3	3	3	3	3	3	1	3	1	3	3	3	3	3	3	3	3	3	3	1	3	3	1	3	1	3	3	3	3	3	3	3	3	3	3	3	3
0	2	3	3	3	3	3	3	3	3	3	3	3	3	3	3	3	3	3	3	1	3	3	3	1	3	3	3	3	3	3	3	3	3	3	1	3	3	3	3	3	3	3	3	1	3	3	3	3	3
2	3	3	3	3	3	3	3	3	3	3	1	3	3	3	3	2	3	3	3	3	3	3	3	3	3	3	3	3	3	3	3	3	3	3	3	1	3	3	3	3	3	1	3	3	3	3	3	3	3
3	3	3	3	3	3	3	3	3	3	3	3	1	3	3	2	0	2	3	3	3	3	3	3	3	3	1	3	3	3	3	3	3	3	3	3	3	3	3	3	3	3	3	3	3	3	3	3	3	3
3	3	3	3	3	3	3	3	3	3	3	3	3	3	3	3	2	3	3	1	3	3	3	3	3	3	3	3	3	3	3	3	3	3	3	3	3	3	3	3	3	3	3	3	3	3	3	3	1	1
3	1	1	3	3	3	3	3	3	3	3	3	3	3	3	3	3	1	3	3	3	1	3	3	3	3	3	3	3	3	3	3	1	1	3	3	3	3	3	1	3	3	3	3	1	3	3	3	3	3
3	1	3	3	3	3	3	3	1	3	3	3	3	3	3	3	3	3	1	3	3	1	3	3	3	3	3	3	3	3	3	3	3	1	3	3	3	3	3	3	3	3	3	3	3	3	3	3	3	3
3	3	1	3	3	3	3	3	3	3	1	3	1	3	3	3	1	3	3	3	3	3	3	3	3	3	3	3	3	3	1	1	3	3	3	3	3	3	3	3	3	3	3	3	3	3	3	3	3	3
3	3	3	3	3	3	3	3	3	3	3	3	3	3	3	3	3	3	3	3	3	3	3	3	3	1	3	3	3	3	3	3	3	3	3	3	1	3	3	3	3	3	3	3	3	3	3	3	3	3
3	3	3	1	3	3	3	3	0	3	3	1	1	3	3	1	3	1	3	3	3	3	3	3	3	3	3	3	3	1	3	3	3	3	3	3	3	1	3	3	3	3	3	3	3	1	3	3	3	3
3	3	3	3	3	3	3	2	0	2	3	3	3	3	3	3	3	3	3	3	3	3	3	3	3	3	3	1	3	1	3	1	3	3	3	3	3	3	3	3	3	3	3	3	3	3	3	3	3	1
3	3	3	3	3	3	3	3	2	3	3	3	3	3	1	3	3	3	3	3	1	3	3	3	3	3	3	1	3	3	3	1	3	3	3	3	3	3	3	3	1	3	3	3	3	3	3	3	3	3
3	3	3	3	3	3	3	3	3	3	3	3	3	3	3	3	3	3	3	3	3	3	3	3	3	3	3	3	3	3	3	3	3	3	3	3	3	3	3	3	3	1	3	3	3	3	3	3	3	3
3	3	3	3	1	3	3	1	3	3	3	1	3	3	3	3	3	1	1	3	3	3	3	3	3	3	3	3	3	3	1	3	3	3	3	3	3	1	1	3	3	3	3	3	3	3	3	3	3	3
3	3	3	3	3	3	1	3	1	1	1	3	3	1	3	3	3	3	3	3	3	3	3	3	3	3	3	3	3	3	3	3	3	3	3	3	3	3	3	3	3	3	3	3	3	3	3	3	3	3
3	3	3	3	3	3	3	3	3	3	3	3	3	3	3	3	1	3	3	3	3	3	1	3	3	3	1	3	3	3	3	3	3	3	3	1	3	3	3	3	3	3	3	3	3	3	3	3	3	3
3	3	1	3	3	3	3	3	3	3	3	1	3	3	1	1	3	1	3	3	3	3	3	3	3	3	3	3	3	3	3	3	3	3	3	3	3	3	3	3	3	3	1	3	3	3	3	3	3	3
3	3	3	3	3	3	3	3	3	3	3	3	3	3	3	3	3	3	3	3	3	3	1	3	3	1	1	3	3	3	3	3	3	3	3	3	3	3	3	3	3	3	3	1	1	3	3	3	3	3
3	3	3	3	3	3	3	3	3	3	3	1	3	3	3	3	3	3	1	3	3	1	3	3	3	3	3	1	3	3	3	3	3	3	3	3	3	3	3	1	3	3	3	3	3	3	3	3	3	3
3	3	3	3	3	3	3	3	3	3	3	3	3	3	3	3	3	3	3	3	3	3	3	3	3	3	1	1	3	3	3	3	3	1	3	3	3	3	1	3	3	3	3	3	3	3	3	3	3	3
3	3	3	1	3	3	3	3	3	3	3	3	3	3	3	3	3	3	3	3	3	3	3	3	1	3	3	3	3	3	1	3	3	3	3	3	2	3	3	3	3	3	3	3	3	3	3	3	3	3
3	3	1	3	3	3	3	1	3	3	3	1	3	3	3	3	3	3	3	3	3	1	3	3	3	3	3	3	3	3	1	3	3	3	3	2	0	2	3	3	3	3	1	3	3	3	3	3	3	3
3	1	3	1	3	3	3	3	3	1	3	3	3	3	3	3	3	3	3	3	3	3	3	3	3	3	1	3	3	1	3	3	3	3	3	3	0	3	3	3	3	3	3	3	3	3	3	1	3	3
[truncated: 50 more columns]

## Sheet: MCS=500
1	3	3	3	3	3	3	3	3	3	3	3	1	3	1	3	3	3	3	3	3	1	3	3	3	3	1	3	3	3	3	3	3	3	3	3	3	3	3	3	3	3	3	3	3	3	3	3	3	3
3	3	3	3	3	3	3	3	3	3	1	3	3	3	3	3	3	3	3	3	3	3	3	3	3	3	3	3	3	3	3	3	3	3	3	3	3	3	3	3	3	3	3	3	3	3	3	3	3	3
1	3	3	3	3	3	3	1	3	3	3	3	3	3	3	3	3	1	1	3	3	3	3	3	3	1	3	3	3	3	3	3	3	3	3	3	1	3	3	1	3	3	3	3	1	1	3	3	3	3
3	1	3	3	3	3	3	3	3	3	3	3	3	3	1	3	1	3	3	3	3	3	3	3	3	3	1	3	3	3	3	3	3	3	3	3	3	3	3	3	3	3	3	3	3	3	3	3	3	3
3	3	3	3	3	3	3	3	3	3	3	3	3	3	3	3	3	3	3	3	3	3	3	3	3	3	3	3	3	3	3	3	3	3	3	3	3	3	3	3	3	1	3	3	3	3	3	3	3	3
3	3	3	3	3	3	1	3	3	3	3	3	3	3	3	3	3	3	3	3	3	3	1	3	3	3	3	3	1	3	3	3	3	3	3	3	3	3	3	3	3	1	3	3	3	1	3	3	3	3
3	3	3	3	3	3	3	3	3	3	3	3	3	3	3	1	3	3	3	1	3	3	3	3	3	3	3	3	3	3	3	3	3	3	3	3	3	3	1	3	3	3	3	3	3	3	3	3	1	1
3	3	3	3	1	3	3	3	3	3	3	3	3	3	3	3	3	3	3	3	1	3	3	3	3	3	3	3	3	3	3	3	3	3	3	3	3	3	3	3	3	3	3	3	1	3	3	1	3	3
3	3	3	3	3	3	3	3	1	3	1	1	3	1	3	3	3	3	3	3	1	3	3	3	3	3	3	3	3	3	3	3	3	3	3	3	3	3	3	3	3	3	3	1	3	3	3	3	3	3
3	3	3	1	3	3	3	3	3	3	3	3	3	3	3	3	1	3	3	3	3	3	3	3	3	3	3	3	3	3	3	3	3	3	3	3	3	3	3	3	3	3	3	3	3	3	3	3	3	1
3	3	3	3	3	3	3	3	3	3	1	3	3	3	3	3	3	3	1	3	3	3	3	3	3	3	3	3	3	3	3	3	3	3	3	3	3	3	1	3	3	3	3	3	3	3	3	3	3	3
3	3	3	3	3	3	3	3	3	3	3	3	1	3	3	3	3	3	3	3	1	3	3	3	3	1	3	3	3	3	3	3	3	3	3	1	3	3	3	3	3	3	3	3	3	3	3	3	3	1
3	3	3	3	3	3	3	3	3	3	3	3	3	3	3	3	3	3	3	3	1	3	3	1	3	3	3	3	3	3	3	3	3	3	3	3	3	3	1	3	1	3	3	3	3	3	3	3	3	3
3	3	3	3	3	3	3	1	3	3	3	1	3	3	3	3	3	3	3	3	3	3	3	1	3	3	3	3	1	3	3	3	3	3	3	3	3	3	3	3	3	1	3	3	3	3	1	3	3	3
3	3	3	3	3	3	1	3	3	3	3	3	3	3	3	1	3	3	3	3	3	3	3	3	3	3	3	3	3	3	3	3	3	3	3	3	3	3	3	3	3	3	3	3	1	3	3	3	3	3
3	1	3	3	3	3	3	3	1	3	3	3	3	3	3	3	3	3	3	3	3	1	3	3	3	3	3	3	3	3	3	3	3	3	1	3	3	3	3	3	3	3	3	3	3	3	3	3	3	3
3	1	3	3	1	3	3	3	3	3	3	3	3	3	3	3	3	3	3	3	3	3	3	3	3	3	1	3	3	3	3	3	3	3	3	3	3	1	3	3	3	1	3	1	3	3	3	3	3	3
3	3	3	3	3	3	3	3	3	3	1	3	3	3	3	3	3	1	3	3	3	1	3	3	3	3	3	3	3	3	3	3	3	3	3	3	3	3	1	3	3	3	3	3	3	3	3	3	3	3
3	3	3	3	3	3	3	3	3	3	3	3	3	3	3	3	3	3	3	1	3	3	3	3	3	3	3	3	3	1	3	3	3	3	3	3	3	3	3	3	3	3	3	3	3	3	3	3	3	3
3	3	3	3	3	3	3	3	3	3	3	3	1	1	3	3	3	3	3	3	3	3	3	3	1	3	3	3	1	3	3	3	3	3	3	3	3	3	3	3	3	3	3	3	3	3	1	1	3	3
3	3	3	3	3	1	3	3	1	3	3	3	3	3	3	1	3	3	3	1	3	3	3	3	1	3	3	3	3	3	3	3	3	3	3	3	3	1	3	3	3	3	2	3	3	1	1	3	3	3
3	3	1	3	3	1	3	3	3	3	3	3	1	3	3	1	3	3	3	3	3	3	3	3	3	3	3	3	3	3	3	3	1	3	3	3	3	3	3	3	3	2	0	2	3	3	3	3	3	3
3	3	1	3	3	3	3	3	1	3	3	3	1	3	3	3	3	3	3	3	3	3	3	3	1	1	3	3	3	3	3	3	3	3	3	3	3	3	3	3	3	2	0	2	2	3	3	1	3	3
3	3	3	3	3	1	3	3	3	3	3	3	3	3	3	3	3	3	3	3	3	3	3	1	3	3	3	1	3	3	3	1	3	3	3	3	3	3	3	3	3	3	0	2	0	0	3	1	3	3
3	3	3	1	3	3	3	3	3	3	3	3	1	3	3	3	3	3	3	3	1	3	1	3	3	3	3	3	3	3	3	3	3	3	3	3	1	3	3	3	3	3	3	3	2	3	3	3	3	3
3	3	3	3	3	3	3	3	3	3	3	3	3	3	3	3	3	3	3	3	3	3	3	1	3	3	1	3	3	3	3	3	3	3	3	3	3	3	3	3	3	3	3	3	3	3	3	3	3	3
3	3	3	3	3	3	3	3	3	3	3	1	1	3	3	3	3	3	3	3	3	3	1	3	3	3	1	3	3	3	3	3	3	3	3	3	3	3	3	3	1	1	3	1	3	3	3	3	3	3
1	3	3	3	3	1	3	3	3	3	1	3	3	3	3	3	3	3	3	3	3	3	3	3	3	1	2	3	3	3	3	3	3	3	3	3	3	3	3	3	3	1	3	3	3	3	1	3	3	3
3	3	3	1	3	3	3	3	3	3	3	3	3	3	3	3	3	3	3	3	3	1	3	3	3	2	0	2	3	3	3	3	3	3	3	3	3	3	3	3	3	3	1	3	3	3	3	3	1	3
3	3	3	3	3	3	3	3	3	1	3	3	3	3	3	1	3	3	3	3	3	3	3	3	3	3	2	3	3	3	3	1	3	3	3	3	3	3	3	3	1	3	3	3	3	3	3	3	3	3
3	3	3	3	3	3	3	3	3	3	3	3	3	3	3	3	3	3	3	1	3	3	3	3	3	3	1	3	3	3	3	3	3	3	3	1	3	3	3	3	3	3	3	3	3	3	3	3	3	3
3	3	3	3	3	3	3	3	3	3	3	3	3	3	3	3	3	3	3	0	1	3	3	3	3	3	3	3	3	3	3	3	3	3	1	3	3	3	3	3	3	3	3	3	3	3	3	3	3	3
3	3	3	3	3	3	3	3	3	3	3	3	3	3	3	3	3	3	3	0	3	3	1	3	3	3	3	3	3	3	3	3	3	1	3	1	3	3	3	3	3	3	1	3	1	3	3	3	1	3
3	3	3	3	3	3	3	3	3	3	3	3	3	2	3	3	3	1	3	3	1	3	3	3	3	3	3	3	3	1	3	3	3	3	3	3	3	3	3	3	3	3	3	3	3	3	3	3	3	3
3	3	3	3	3	3	3	3	3	3	3	3	0	0	2	3	3	3	3	3	3	3	3	3	3	3	1	3	3	3	3	3	3	3	3	3	3	3	3	3	3	3	3	3	3	3	3	1	3	1
3	3	1	3	2	3	3	3	3	1	3	3	3	2	3	3	3	3	3	3	3	3	3	3	3	1	3	3	3	3	3	3	3	3	3	3	3	3	3	3	3	3	3	3	3	3	3	1	3	3
3	3	3	0	0	2	3	3	3	3	3	3	3	3	3	3	3	3	3	3	1	3	3	3	3	3	3	3	3	3	3	3	3	3	3	3	3	3	3	3	3	3	1	3	3	1	3	3	1	3
3	3	3	1	2	3	3	3	3	3	3	1	3	3	3	3	1	3	3	3	3	3	3	3	3	1	3	3	3	3	3	3	3	3	3	3	3	1	3	3	3	3	3	3	3	3	1	3	3	3
3	3	1	3	3	3	3	3	3	3	3	3	3	3	3	3	3	1	3	3	3	3	3	3	3	3	3	3	3	3	3	3	3	3	3	3	3	3	3	3	3	1	1	3	3	3	3	3	1	3
3	3	1	3	3	3	3	3	3	1	3	3	3	3	3	3	3	3	3	3	3	3	3	3	3	1	3	3	3	3	3	3	3	1	1	3	3	3	3	3	3	3	3	3	3	3	3	3	3	3
3	3	3	3	3	3	3	3	3	1	3	3	3	3	3	3	3	3	3	3	3	3	3	1	3	1	3	3	3	3	3	3	3	3	3	3	3	3	3	3	3	1	3	3	3	3	3	3	3	3
0	2	3	3	3	3	3	3	3	3	3	1	3	3	3	3	3	3	3	3	3	3	3	3	1	3	3	3	1	3	1	3	3	3	3	3	3	3	3	3	1	3	3	3	1	3	3	1	3	3
2	0	2	3	1	3	3	3	3	1	1	3	3	3	3	3	3	3	3	3	3	1	3	3	3	3	1	3	3	3	3	3	3	3	3	3	1	3	3	3	3	3	3	3	3	3	3	3	3	1
3	0	1	3	3	3	3	3	3	3	3	3	3	3	3	3	3	3	3	3	3	3	3	3	3	3	1	1	3	1	3	3	3	3	3	3	3	3	3	3	3	3	3	3	3	3	3	3	1	3
3	3	3	3	3	3	3	3	3	3	3	3	1	3	1	1	3	3	3	1	3	3	3	3	3	1	3	3	3	3	3	3	3	3	3	3	3	3	3	3	3	3	3	3	3	3	3	3	3	3
3	3	1	1	3	3	3	3	3	3	3	3	1	3	3	3	3	3	3	3	3	3	3	3	3	3	3	3	3	3	1	3	3	3	3	3	3	3	3	3	3	3	3	1	3	3	3	3	3	3
3	3	3	1	3	3	3	3	1	3	3	3	3	3	3	3	3	3	3	1	3	3	3	1	3	3	3	3	3	3	3	3	3	3	3	3	3	1	3	3	1	3	3	3	3	3	3	3	3	1
3	2	3	3	3	3	3	3	3	3	3	3	3	3	3	3	3	3	3	3	3	3	3	1	3	3	3	3	3	3	3	3	3	3	3	3	3	3	3	3	3	3	1	3	3	3	3	1	3	3
2	0	2	3	3	3	3	3	3	3	3	3	3	1	3	3	3	3	3	3	3	3	3	1	3	3	3	3	3	3	3	3	3	3	3	1	3	3	3	3	3	3	3	3	3	3	3	3	3	3
3	2	3	3	3	3	3	3	1	1	3	3	3	3	3	3	3	3	3	1	3	3	3	3	3	3	3	3	3	3	3	1	3	3	3	3	3	1	3	3	3	1	3	3	3	3	3	3	3	3
3	3	3	3	3	3	3	3	3	3	3	1	3	3	3	3	3	3	3	1	3	3	3	3	3	3	3	3	3	3	3	3	3	3	3	3	3	3	3	3	3	3	3	3	3	3	3	3	3	1
3	3	3	3	1	1	3	3	3	3	3	3	3	1	3	3	3	3	3	3	3	1	3	3	3	3	3	3	3	3	3	3	3	3	3	3	3	3	3	3	3	3	3	3	3	3	3	3	3	3
3	3	3	3	3	3	3	3	3	3	3	3	3	1	3	3	3	3	3	3	3	3	3	3	3	3	3	3	3	3	3	3	3	3	3	3	3	3	3	3	3	3	3	3	3	3	3	3	3	3
3	3	3	3	1	3	3	3	3	3	3	3	3	3	3	3	3	3	3	3	3	3	3	3	1	3	3	3	3	3	3	3	3	3	3	3	3	3	3	1	3	1	3	3	3	3	3	3	3	3
3	3	1	3	3	3	3	3	3	3	3	3	3	3	3	3	3	3	3	3	3	3	3	3	3	3	1	1	3	3	3	3	3	3	3	3	3	1	3	3	3	3	3	3	3	3	3	3	3	3
1	3	1	3	3	3	3	3	1	3	3	3	3	3	3	3	3	3	3	3	3	3	3	3	3	3	3	3	3	3	3	3	3	3	3	3	3	3	3	3	3	3	3	3	3	3	3	2	3	3
3	3	3	3	3	3	3	3	3	3	3	3	3	3	3	3	3	3	3	3	3	3	3	3	3	3	3	3	3	3	3	3	3	3	3	3	3	3	3	3	3	1	3	1	3	3	2	0	2	3
3	3	3	3	3	3	3	3	3	1	3	3	3	3	3	3	1	3	3	1	1	3	3	3	3	3	3	1	3	3	3	3	3	1	3	3	3	3	3	1	3	3	3	3	3	3	3	2	1	3
3	3	3	3	3	3	3	3	3	3	3	3	3	1	3	1	3	3	3	3	3	3	3	3	3	3	3	3	3	3	3	1	3	3	3	3	1	3	3	3	3	3	3	3	3	3	3	1	3	3
3	3	3	1	3	3	3	2	3	3	3	3	3	3	3	3	3	3	3	3	1	3	3	3	3	3	3	3	3	3	3	3	1	3	3	3	3	1	3	3	3	3	3	3	3	1	1	3	3	3
3	3	3	3	3	3	2	0	0	3	3	3	3	3	1	3	3	3	1	3	3	3	3	3	1	3	3	3	1	3	3	3	3	3	3	3	3	3	3	3	3	3	3	3	3	1	3	3	3	1
3	3	3	3	3	3	3	2	3	3	3	3	3	3	3	3	3	3	3	3	3	3	3	3	3	1	3	3	3	3	3	3	3	3	3	3	3	1	3	3	3	3	3	3	3	3	3	3	3	3
3	3	3	3	3	3	3	3	3	1	3	1	3	3	3	3	3	3	3	3	3	3	3	3	3	3	3	3	3	3	3	1	3	1	3	3	3	3	3	3	3	3	3	3	3	3	1	3	3	3
3	3	3	3	3	3	3	3	3	3	3	1	1	3	3	3	3	3	3	3	3	3	3	3	3	3	1	3	3	3	1	3	3	3	3	3	1	3	3	3	3	2	0	1	3	3	3	3	3	3
3	3	3	3	3	3	3	3	1	3	3	3	1	3	3	3	3	3	3	3	3	3	3	3	1	3	3	3	3	3	3	3	3	3	1	3	1	3	3	1	2	0	2	3	3	3	3	3	3	3
3	3	1	3	3	3	3	3	3	3	1	3	3	3	3	3	3	3	3	3	1	1	3	3	3	3	3	3	3	1	3	3	3	3	3	3	3	1	3	3	3	2	3	3	3	3	1	3	3	3
3	3	3	3	3	3	3	3	3	3	3	3	3	3	3	3	3	3	3	3	3	3	3	3	3	3	3	3	3	3	3	3	1	3	3	3	3	3	1	3	3	3	3	3	3	3	3	3	3	3
3	3	3	3	3	3	3	3	3	3	3	3	3	3	3	3	3	3	1	3	3	1	1	3	3	3	2	3	3	3	3	1	3	3	3	3	3	3	3	3	3	3	3	3	3	3	1	3	3	3
1	3	3	3	3	3	3	3	3	3	3	3	3	3	3	3	3	3	3	3	3	3	1	1	3	0	0	0	3	3	3	3	1	3	3	3	3	3	3	3	3	1	3	1	3	3	3	3	3	1
3	3	3	3	3	3	3	3	3	3	3	3	3	3	3	3	1	3	3	3	1	3	3	3	3	3	2	3	3	3	3	3	3	3	3	3	3	3	3	3	3	3	3	1	3	3	3	3	3	3
3	3	3	3	3	3	3	3	3	3	3	3	3	3	3	3	3	3	3	3	3	3	3	3	3	1	3	3	1	3	3	3	1	3	3	3	3	3	3	3	3	3	3	3	3	3	3	3	3	3
3	3	3	3	3	3	3	3	1	3	3	3	3	3	3	3	3	3	3	3	1	3	3	3	3	3	3	3	3	3	3	3	1	3	3	3	3	3	3	3	3	1	3	3	1	3	1	1	3	3
3	3	3	3	3	1	3	1	3	3	3	3	3	3	3	1	3	3	3	3	1	3	1	3	1	3	3	3	3	3	3	3	3	3	3	1	3	1	3	3	3	3	3	3	3	3	3	3	3	3
3	3	3	3	1	3	3	3	3	3	3	3	3	3	3	3	3	3	3	3	3	3	3	3	1	3	3	3	3	3	3	3	3	3	3	3	3	3	3	3	3	3	3	3	3	1	3	3	3	1
3	3	3	3	3	3	3	1	3	3	1	3	3	3	3	3	3	1	3	1	1	3	3	3	1	3	3	3	3	3	3	1	3	3	3	3	3	3	3	3	3	3	3	3	3	3	3	3	3	3
3	3	3	3	1	3	3	3	3	3	3	1	3	1	1	3	3	3	3	3	3	3	3	3	3	3	3	3	3	1	1	3	3	3	3	3	3	3	3	3	1	3	3	3	3	3	3	3	3	3
1	3	1	1	3	1	3	3	3	1	3	3	3	3	3	3	3	3	3	3	3	3	3	3	3	3	3	3	3	3	1	3	3	3	3	3	3	3	3	3	3	3	3	3	3	3	3	3	3	3
2	3	3	1	3	3	3	3	3	3	3	3	3	3	3	3	3	3	3	1	3	1	3	3	3	3	3	3	3	3	3	3	1	3	3	1	3	1	3	3	3	3	3	3	3	3	3	3	3	3
0	2	3	3	3	3	3	3	3	3	3	3	3	3	3	3	3	3	3	3	1	3	3	3	1	3	3	3	3	3	3	3	3	3	3	1	3	3	3	3	3	3	3	3	1	3	3	3	3	3
2	3	3	3	3	3	3	3	3	3	3	1	3	3	3	3	2	3	3	3	3	3	3	3	3	3	3	3	3	3	3	3	3	3	3	3	1	3	3	3	3	3	1	3	3	3	3	3	3	3
3	3	3	3	3	3	3	3	3	3	3	3	1	3	3	2	0	2	3	3	3	3	3	3	3	3	1	3	3	3	3	3	3	3	3	3	3	3	3	3	3	3	3	3	3	3	3	3	3	3
3	3	3	3	3	3	3	3	3	3	3	3	3	3	3	3	2	3	3	1	3	3	3	3	3	3	3	3	3	3	3	3	3	3	3	3	3	3	3	3	3	3	3	3	3	3	3	3	1	1
3	1	1	3	3	3	3	3	3	3	3	3	3	3	3	3	3	1	3	3	3	1	3	3	3	3	3	3	3	3	3	3	1	1	3	3	3	3	3	1	3	3	3	3	1	3	3	3	3	3
3	1	3	3	3	3	3	3	1	3	3	3	3	3	3	3	3	3	1	3	3	1	3	3	3	3	3	3	3	3	3	3	3	1	3	3	3	3	3	3	3	3	3	3	3	3	3	3	3	3
3	3	1	3	3	3	3	3	3	3	1	3	1	3	3	3	1	3	3	3	3	3	3	3	3	3	3	3	3	3	1	1	3	3	3	3	3	3	3	3	3	3	3	3	3	3	3	3	3	3
3	3	3	3	3	3	3	3	3	3	3	3	3	3	3	3	3	3	3	3	3	3	3	3	3	1	3	3	3	3	3	3	3	3	3	3	1	3	3	3	3	3	3	3	3	3	3	3	3	3
3	3	3	1	3	3	3	3	0	3	3	1	1	3	3	1	3	1	3	3	3	3	3	3	3	3	3	3	3	1	3	3	3	3	3	3	3	1	3	3	3	3	3	3	3	1	3	3	3	3
3	3	3	3	3	3	3	2	0	2	3	3	3	3	3	3	3	3	3	3	3	3	3	3	3	3	3	1	3	1	3	1	3	3	3	3	3	3	3	3	3	3	3	3	3	3	3	3	3	1
3	3	3	3	3	3	3	3	2	3	3	3	3	3	1	3	3	3	3	3	1	3	3	3	3	3	3	1	3	3	3	1	3	3	3	3	3	3	3	3	1	3	3	3	3	3	3	3	3	3
3	3	3	3	3	3	3	3	3	3	3	3	3	3	3	3	3	3	3	3	3	3	3	3	3	3	3	3	3	3	3	3	3	3	3	3	3	3	3	3	3	1	3	3	3	3	3	3	3	3
3	3	3	3	1	3	3	1	3	3	3	1	3	3	3	3	3	1	1	3	3	3	3	3	3	3	3	3	3	3	1	3	3	3	3	3	3	1	1	3	3	3	3	3	3	3	3	3	3	3
3	3	3	3	3	3	1	3	1	1	1	3	3	1	3	3	3	3	3	3	3	3	3	3	3	3	3	3	3	3	3	3	3	3	3	3	3	3	3	3	3	3	3	3	3	3	3	3	3	3
3	3	3	3	3	3	3	3	3	3	3	3	3	3	3	3	1	3	3	3	3	3	1	3	3	3	1	3	3	3	3	3	3	3	3	1	3	3	3	3	3	3	3	3	3	3	3	3	3	3
3	3	1	3	3	3	3	3	3	3	3	1	3	3	1	1	3	1	3	3	3	3	3	3	3	3	3	3	3	3	3	3	3	3	3	3	3	3	3	3	3	3	1	3	3	3	3	3	3	3
3	3	3	3	3	3	3	3	3	3	3	3	3	3	3	3	3	3	3	3	3	3	1	3	3	1	1	3	3	3	3	3	3	3	3	3	3	3	3	3	3	3	3	1	1	3	3	3	3	3
3	3	3	3	3	3	3	3	3	3	3	1	3	3	3	3	3	3	1	3	3	1	3	3	3	3	3	1	3	3	3	3	3	3	3	3	3	3	3	1	3	3	3	3	3	3	3	3	3	3
3	3	3	3	3	3	3	3	3	3	3	3	3	3	3	3	3	3	3	3	3	3	3	3	3	3	1	1	3	3	3	3	3	1	3	3	3	3	1	3	3	3	3	3	3	3	3	3	3	3
3	3	3	1	3	3	3	3	3	3	3	3	3	3	3	3	3	3	3	3	3	3	3	3	1	3	3	3	3	3	1	3	3	3	3	3	2	3	3	3	3	3	3	3	3	3	3	3	3	3
3	3	1	3	3	3	3	1	3	3	3	1	3	3	3	3	3	3	3	3	3	1	3	3	3	3	3	3	3	3	1	3	3	3	3	2	0	2	3	3	3	3	1	3	3	3	3	3	3	3
3	1	3	1	3	3	3	3	3	1	3	3	3	3	3	3	3	3	3	3	3	3	3	3	3	3	1	3	3	1	3	3	3	3	3	3	0	3	3	3	3	3	3	3	3	3	3	1	3	3
[truncated: 50 more columns]
